# Supplementary material
Source: Elsevier journal article supplement (https://www.sciencedirect.com/science/article/pii/S2387020618302195)
Supplement: mmc1 [file S2387020618302195:mmc1.pdf]

## **Documento de consenso sobre la implementación de la secuenciación masiva de nueva generación en el diagnóstico genético de la predisposición hereditaria al cáncer**

José Luis Soto, Ignacio Blanco, Orland Díez, Javier García Planells, Isabel Lorda, Gert Matthijs, Mercedes Robledo, Erika Souche y Conxi Lázaro\*

### **Material Suplementario 1**

#### **EVALUACIÓN DE LA GUÍA SEGÚN LA METODOLOGÍA AGREE II**

##### **METODOLOGÍA**

El presente documento ha sido realizado siguiendo la metodología establecida en el protocolo para guías clínicas AGREE II (7).

[http://www.guiasalud.es/contenidos/documentos/Guias\\_Practica\\_Clinica/Spanish-AGREE-II](http://www.guiasalud.es/contenidos/documentos/Guias_Practica_Clinica/Spanish-AGREE-II)

Los dominios e ítems a considerar y que son evaluados por un grupo multidisciplinar de expertos como evaluadores externos son:

##### Dominio 1.

Alcance y Objetivo alude al propósito general de la guía, a los aspectos de salud específicos y a la población diana (ítems 1-3).

1. El(los) objetivo(s) general(es) de la guía está(n) específicamente descrito(s).
2. El(los) aspecto(s) de salud cubierto(s) por la guía está(n) específicamente descrito(s).
3. La población (pacientes, público, etc.) a la cual se pretende aplicar la guía está específicamente descrita.

##### Dominio 2.

Participación de los implicados se refiere al grado en el que la guía ha sido elaborada por los implicados o interesados y representa los puntos de vista de los usuarios a los que está destinada (ítems 4-6).

4. El grupo que desarrolla la guía incluye individuos de todos los grupos profesionales relevantes.
5. Se han tenido en cuenta los puntos de vista y preferencias de la población diana (pacientes, público, etc.).
6. Los usuarios diana de la guía están claramente definidos.

##### Dominio 3.

Rigor en la Elaboración hace referencia al proceso utilizado para reunir y sintetizar la evidencia, los métodos para formular las recomendaciones y para actualizarlas (ítems 7-14).

7. Se han utilizado métodos sistemáticos para la búsqueda de la evidencia.
8. Los criterios para seleccionar la evidencia se describen con claridad.
9. Las fortalezas y limitaciones del conjunto de la evidencia están claramente descritas.
10. Los métodos utilizados para formular las recomendaciones están claramente descritos.
11. Al formular las recomendaciones han sido considerados los beneficios en salud, los efectos secundarios y los riesgos.
12. Hay una relación explícita entre cada una de las recomendaciones y las evidencias en las que se basan.
13. La guía ha sido revisada por expertos externos antes de su publicación.
14. Se incluye un procedimiento para actualizar la guía.

##### Dominio 4.

Claridad de la Presentación tiene que ver con el lenguaje, la estructura y el formato de la guía (ítems 15-17).

15. Las recomendaciones son específicas y no son ambiguas.
16. Las distintas opciones para el manejo de la enfermedad o condición de salud se presentan claramente.
17. Las recomendaciones clave son fácilmente identificables.

#### Dominio 5.

Aplicabilidad hace referencia a las posibles barreras y factores facilitadores para su implantación, las estrategias para mejorar su adopción y las implicaciones de la aplicación de la guía en los recursos (ítems 18-21).

18. La guía describe factores facilitadores y barreras para su aplicación.
19. La guía proporciona consejo y/o herramientas sobre cómo las recomendaciones pueden ser llevadas a la práctica.
20. Se han considerado las posibles implicaciones de la aplicación de las recomendaciones sobre los recursos.
21. La guía ofrece criterios para monitorización y/o auditoria.

#### Dominio 6.

Independencia editorial tiene que ver con que la formulación de las recomendaciones no esté sesgada por conflictos de intereses (ítems 22-23).

22. Los puntos de vista de la entidad financiadora no han influido en el contenido de la guía.
23. Se han registrado y abordado los conflictos de intereses de los miembros del grupo elaborador de la guía.

#### Evaluación global.

La Evaluación global incluye una puntuación de la calidad general de la guía y sobre si la guía debe ser recomendada para su utilización en la práctica.

1. Puntúe la calidad global de la guía.
2. ¿Recomendaría esta guía para su uso?
  - ☐ Sí
  - ☐ Sí, con modificaciones
  - ☐ No

#### **Cálculo de la puntuación de cada dominio.**

Las puntuaciones de los dominios se calculan sumando todos los puntos de los ítems individuales del dominio y estandarizando el total, como un porcentaje sobre la máxima puntuación posible para ése dominio.

Se utiliza la siguiente fórmula:

$$\frac{\text{Puntuación obtenida} - \text{Puntuación mínima posible}}{\text{Puntuación máxima posible} - \text{Puntuación mínima posible}}$$

Donde:

- la puntuación máxima obtenida es el sumatorio de todas las puntuaciones de todos los evaluadores para todos los ítems del dominio.
- la puntuación mínima posible es 1 X el número de evaluadores.
- la puntuación máxima posible es 7 X el número de evaluadores.

#### **RESULTADOS**

En la Tabla S1 se desglosa la valoración individual de cada uno de los ítems y dominios por cada uno de los evaluadores expertos.

Cuatro de los ítems han sido considerados como no aplicables en la presente guía por al menos uno de los revisores. Para estos ítems se ha llevado a cabo la adecuada modificación de los cálculos de la puntuación máxima y mínima a considerar en la valoración de los módulos afectados.

El porcentaje obtenido sobre la máxima puntuación varía entre un 89.6% de la participación de los implicados (dominio 3), hasta el 100% correspondiente a la independencia editorial (dominio 6), con una media de los seis dominios del 94.8%.

A continuación se reflejan algunos de los comentarios más relevantes vertidos por los revisores:

*“El grupo que desarrolla la guía incluye profesionales expertos en diagnóstico genético y consejo genético en cáncer, así como representantes del grupo que elaboró la guía europea bajo el amparo de la European Society of Human Genetics. Es un grupo reducido, lo que puede ser positivo en cierta manera, aunque tal vez podría haberse beneficiado de la inclusión de profesionales expertos en ámbitos relevantes como la bioética o la oncología. Sin embargo, esto no parece muy relevante, ya que la guía presentada está fuertemente inspirada en la europea, por lo que los principios básicos ya estaban establecidos”.*

*“Es una guía muy clara, útil y necesaria para los profesionales y para la mejora y estandarización del diagnóstico genético en cáncer en nuestro país”.*

*“Se trata de una guía práctica, completa y técnica que será de gran ayuda para el personal que trabaja en NGS”.*

La calidad global de la guía ha sido puntuada con un 84.2% y los tres revisores sí recomendarían la guía.

En base a estos resultados consideramos que la calidad de la guía es satisfactoria y por consiguiente, recomendable su uso.

**Tabla S1. Valoración de los Ítems y dominios según AGREE II por los evaluadores expertos.**

| Dominio                                     | Ítem      | Evaluador 1 | Evaluador 2 | Evaluador 3 | Puntuación Dominio |
|---------------------------------------------|-----------|-------------|-------------|-------------|--------------------|
| <b>1</b><br>Alcance y objetivo              | <b>1</b>  | 7           | 7           | 7           | <b>96.3%</b>       |
|                                             | <b>2</b>  | 7           | 6           | 7           |                    |
|                                             | <b>3</b>  | 6           | 7           | 7           |                    |
| <b>2</b><br>Participación de los implicados | <b>4</b>  | 6           | 5           | 7           | <b>89.6%</b>       |
|                                             | <b>5</b>  | 6           | 7           | 1*          |                    |
|                                             | <b>6</b>  | 7           | 6           | 7           |                    |
| <b>3</b><br>Rigor en la elaboración         | <b>7</b>  | 7           | 6           | 7           | <b>96.5%</b>       |
|                                             | <b>8</b>  | 7           | 7           | 7           |                    |
|                                             | <b>9</b>  | 7           | 5           | 7           |                    |
|                                             | <b>10</b> | 7           | 7           | 7           |                    |
|                                             | <b>11</b> | 7           | 6           | 6           |                    |
|                                             | <b>12</b> | 7           | 7           | 7           |                    |
|                                             | <b>13</b> | 7           | 7           | 7           |                    |
|                                             | <b>14</b> | 7           | 7           | 7           |                    |
| <b>4</b><br>Claridad de la presentación     | <b>15</b> | 6           | 6           | 7           | <b>94.4%</b>       |
|                                             | <b>16</b> | 7           | 6           | 7           |                    |
|                                             | <b>17</b> | 7           | 7           | 7           |                    |
| <b>5</b><br>Aplicabilidad                   | <b>18</b> | 7           | 6           | 7           | <b>91.7%</b>       |
|                                             | <b>19</b> | 7           | 5           | 7           |                    |
|                                             | <b>20</b> | 7           | 5           |             |                    |
|                                             | <b>21</b> | 7           | 1*          | 7           |                    |
| <b>6</b><br>Independencia editorial         | <b>22</b> | 1*          | 7           | 7           | <b>100%</b>        |
|                                             | <b>23</b> | 1*          | 7           | 7           |                    |

\* No aplica

| Evaluación Global           |                |                |                |                      |
|-----------------------------|----------------|----------------|----------------|----------------------|
| Ítem                        | Evaluador<br>1 | Evaluador<br>2 | Evaluador<br>3 | Puntuación<br>global |
| 1<br>Calidad global         | 6              | 6              | 7              | 84.2%                |
| 2<br>¿Recomendaría la guía? | Si             | Si             | Si             | Si                   |

## Material Suplementario 2

### NIVELES DE EVIDENCIA Y GRADOS DE RECOMENDACIÓN

#### METODOLOGÍA

##### Evaluación crítica de la calidad de los estudios y síntesis:

Para establecer los niveles de evidencia y grados de recomendación en cada uno de los aspectos evaluados en esta guía, se ha utilizado la clasificación propuesta por el Centro de Medicina Basada en la Evidencia de Oxford (OCBM: <http://www.cebm.net/index.aspx?o=5653><sup>15</sup>). Actualmente existen más de 100 sistemas para valorar la calidad de la evidencia, y en la mayoría de estas clasificaciones se opta por señalar unos niveles de evidencia y grado de recomendaciones que sólo tienen en cuenta los estudios sobre intervenciones terapéuticas. La elección de la clasificación OCBM está justificada por la evaluación en la guía de aspectos esencialmente relacionados con el diagnóstico.

Esta clasificación establece 5 niveles de evidencia (de 1 a 5) y 5 grados de recomendación (de A a D). El grado de recomendación A, el más alto, se corresponde con estudios de nivel 1. El grado de recomendación B se entiende como una recomendación favorable y se corresponde con estudios de nivel 2 o 3. El grado de recomendación C se explica como una recomendación favorable pero de forma no concluyente, y se corresponde con estudios de nivel 4. El grado de recomendación D ni recomienda ni desaprueba la intervención a realizar, se corresponde con estudios de nivel 5.

Los niveles de evidencia y grados de recomendación siguiendo las directrices del Centro de Medicina Basada en la Evidencia de Oxford para los estudios diagnósticos se describen a continuación:

**Tabla S2. Clasificación de los Niveles de evidencia y grado de recomendación según OCBM.**

| Estudios de diagnóstico |                    |                                                                                                                                                                                                                                                                                                                                                   |
|-------------------------|--------------------|---------------------------------------------------------------------------------------------------------------------------------------------------------------------------------------------------------------------------------------------------------------------------------------------------------------------------------------------------|
| Grado de recomendación  | Nivel de evidencia | Fuente                                                                                                                                                                                                                                                                                                                                            |
| <b>A</b>                | <b>1 a</b>         | Revisión sistemática de estudios diagnósticos de nivel 1 (alta calidad), con homogeneidad, es decir, que incluya estudios con resultados comparables y en la misma dirección y GPC validadas                                                                                                                                                      |
|                         | <b>1 b</b>         | Estudios de cohortes que validen la calidad de una prueba específica, con unos buenos estándares de referencia (independientes de la prueba) o a partir de algoritmos de estimación del pronóstico o de categorización del diagnóstico                                                                                                            |
|                         | <b>1 c</b>         | Pruebas diagnósticas con especificidad tan alta que un resultado positivo confirma el diagnóstico y con sensibilidad tan alta que un resultado negativo descarta el diagnóstico                                                                                                                                                                   |
| <b>B</b>                | <b>2 a</b>         | Revisión sistemática de estudios diagnósticos de nivel 2 (mediana calidad) con homogeneidad, es decir, que incluya estudios con resultados comparables y en la misma dirección                                                                                                                                                                    |
|                         | <b>2 b</b>         | Estudios exploratorios que, a través de p. e. una regresión logística, determinan qué factores son significativos, y que sean validados con unos buenos estándares de referencia (independientes de la prueba), o a partir de algoritmos de estimación del pronóstico o de categorización del diagnóstico, o de validación de muestras separadas. |
|                         | <b>2 c</b>         | Comparación cegada u objetiva de un espectro una cohorte de pacientes que podría normalmente ser examinado para un                                                                                                                                                                                                                                |

|          |          |                                                                                                                                                                                                                                                                                             |
|----------|----------|---------------------------------------------------------------------------------------------------------------------------------------------------------------------------------------------------------------------------------------------------------------------------------------------|
|          |          | determinado trastorno, pero el estándar de referencia no se aplica a todos los pacientes del estudio.                                                                                                                                                                                       |
| <b>C</b> | <b>4</b> | Los estándares de referencia no son objetivables, cegados o independientes Las pruebas positivas y negativas son verificadas usando estándares de referencia diferentes. El estudio compara pacientes con un trastorno determinado conocido con pacientes diagnosticados de otra condición. |
| <b>D</b> | <b>5</b> | Opinión de expertos sin valoración crítica explícita, ni basada en fisiología, ni en investigación juiciosa ni en los principios fundamentales                                                                                                                                              |

Tras la finalización de la lectura crítica de la evidencia, el grupo elaborador realizó las declaraciones del documento con su graduación correspondiente. Revisión externa: se llevó a cabo mediante la opinión de un grupo multidisciplinar de expertos no autores de esta guía. Los revisores participaron en la revisión de las recomendaciones. El grupo elaborador de la guía revisó los comentarios y las aportaciones provenientes de los revisores externos e introdujo los cambios que consideró oportunos.

## RESULTADOS

En general, todas las declaraciones relacionadas con el proceso de validación analítica a todos los niveles (preanalítico, analítico y postanalítico), y que son requisitos exigibles en las normas de calidad internacionales son consideradas como grado de recomendación A (apartados de utilidad diagnóstica y clínica y valoración de los procedimientos analíticos).

La mayor parte de las declaraciones relacionadas con el consentimiento informado y el asesoramiento genético presentan, en general, un nivel de evidencia 2 y grado de recomendación B.

Los apartados sobre gestión de la información y la distinción entre los ámbitos asistencial y de investigación son difícilmente valorables en términos de evidencia científica medible por los criterios OCBM, por lo que se han considerado como fruto de la recomendación de expertos (nivel de evidencia 5 y grado de recomendación D).

En la Tabla S3 se desglosa el grado de recomendación y nivel de evidencia de cada una de las declaraciones vertidas en el documento.

**Tabla S3. Valoración del nivel de evidencia y grado de recomendación de las declaraciones del documento.**

| <b>Apartado</b>                                                                  | <b>Declaración</b> | <b>Grado de recomendación</b> | <b>Nivel de evidencia</b> |
|----------------------------------------------------------------------------------|--------------------|-------------------------------|---------------------------|
| <b>1. Utilidad clínica y diagnóstica</b>                                         | 1                  | A                             | 1 c                       |
|                                                                                  | 2                  | A                             | 1 c                       |
|                                                                                  | 3                  | A                             | 1 c                       |
|                                                                                  | 4                  | A                             | 1 c                       |
|                                                                                  | 5                  | A                             | 1 c                       |
|                                                                                  | 6                  | A                             | 1 c                       |
|                                                                                  | 7                  | D                             | 5                         |
| <b>2. Consentimiento informado y asesoramiento genético pre-test y post-test</b> | 8                  | A                             | 1 c                       |
|                                                                                  | 9                  | A                             | 1 c                       |
|                                                                                  | 10                 | B                             | 2 b                       |
|                                                                                  | 11                 | B                             | 2 b                       |
|                                                                                  | 12                 | B                             | 2 b                       |
|                                                                                  | 13                 | B                             | 2 b                       |
|                                                                                  | 14                 | B                             | 2 b                       |
|                                                                                  | 15                 | B                             | 2 b                       |
|                                                                                  | 16                 | D                             | 5                         |
| <b>3. Validación de los procedimientos analíticos</b>                            | 17                 | A                             | 1 c                       |
|                                                                                  | 18                 | A                             | 1 c                       |
|                                                                                  | 19                 | A                             | 1 c                       |
|                                                                                  | 20                 | A                             | 1 c                       |
|                                                                                  | 21                 | A                             | 1 c                       |
|                                                                                  | 22                 | A                             | 1 c                       |
|                                                                                  | 23                 | A                             | 1 c                       |
|                                                                                  | 24                 | A                             | 1 c                       |
|                                                                                  | 25                 | D                             | 5                         |
|                                                                                  | 26                 | A                             | 1 c                       |
|                                                                                  | 27                 | A                             | 1 c                       |
|                                                                                  | 28                 | A                             | 1 c                       |
| <b>4. Informe de resultados</b>                                                  | 29                 | A                             | 1 c                       |
|                                                                                  | 30                 | A                             | 1 c                       |
| <b>5. Gestión de la información</b>                                              | 31                 | D                             | 5                         |
|                                                                                  | 32                 | D                             | 5                         |
|                                                                                  | 33                 | D                             | 5                         |
|                                                                                  | 34                 | D                             | 5                         |
| <b>6. Distinción entre ámbito de investigación y ámbito asistencial</b>          | 35                 | D                             | 5                         |
|                                                                                  | 36                 | D                             | 5                         |
|                                                                                  | 37                 | D                             | 5                         |
|                                                                                  | 38                 | D                             | 5                         |
|                                                                                  | 39                 | D                             | 5                         |
|                                                                                  | 40                 | D                             | 5                         |
|                                                                                  | 41                 | D                             | 5                         |
